# Supplementary material for: Preferential adhesion of bacterial cells onto top- and bottom-mounted nanostructured surfaces under flow conditions
Source: Royal Society of Chemistry journal article supplement (doi:10.1039/d3na00581j), 2023-01-01
Supplement: d3na00581j1.pdf [file d3na00581j1.pdf]

## Supporting Information

### Main effect of 3 independent variables on total cell count on flat surface

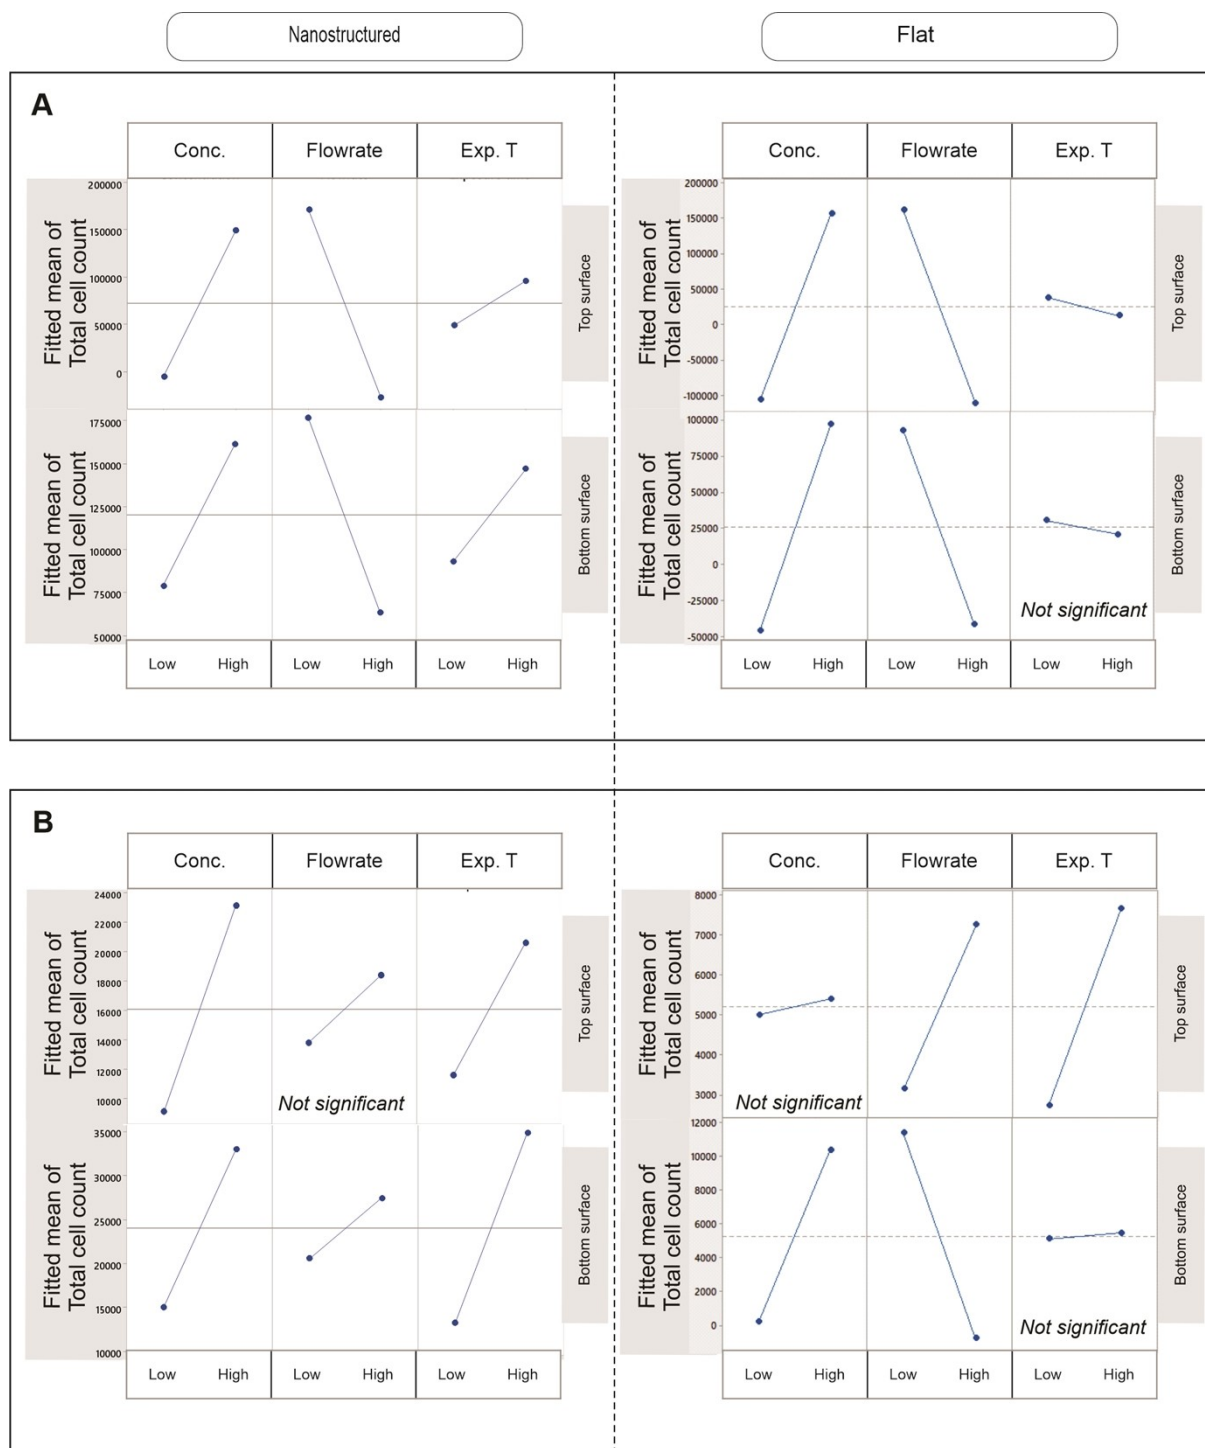

Figure S 1: Main effect of the 3 independent variables (cell concentration [Conc.], flowrate of the suspension [Flowrate], duration of exposure to the flow [Exp. T] on mean of total cell count on top- and bottom-mounted surface averaged over all the levels of other two independent variables. (A) *P. aeruginosa* (B) *S. aureus* species.

## Comparison of Bactericidal efficacy of nanostructured and flat surfaces

**A**

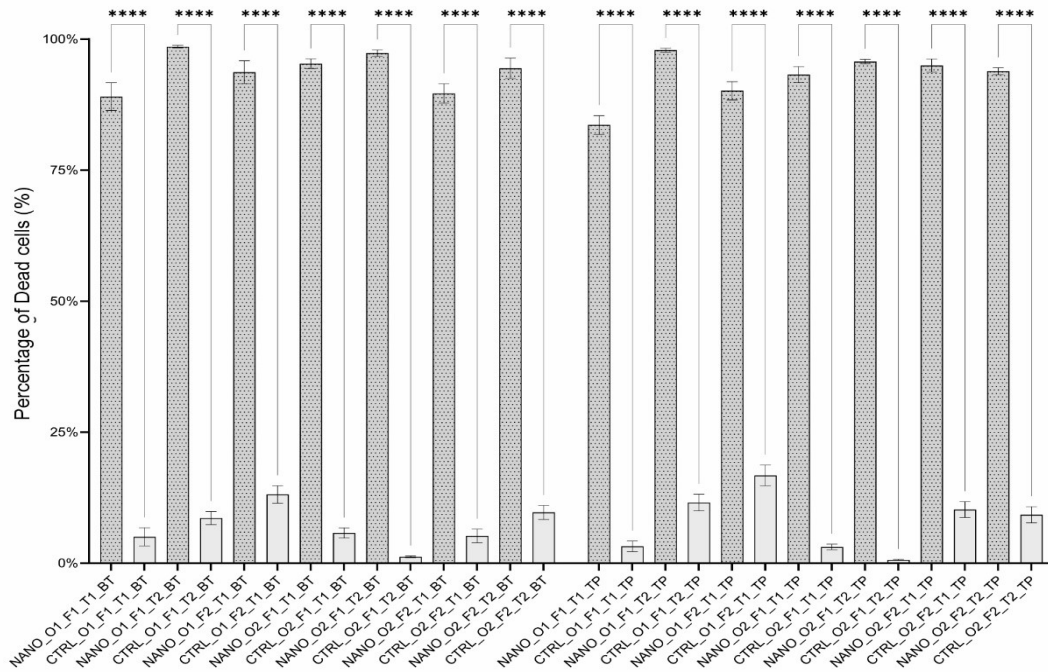

**B**

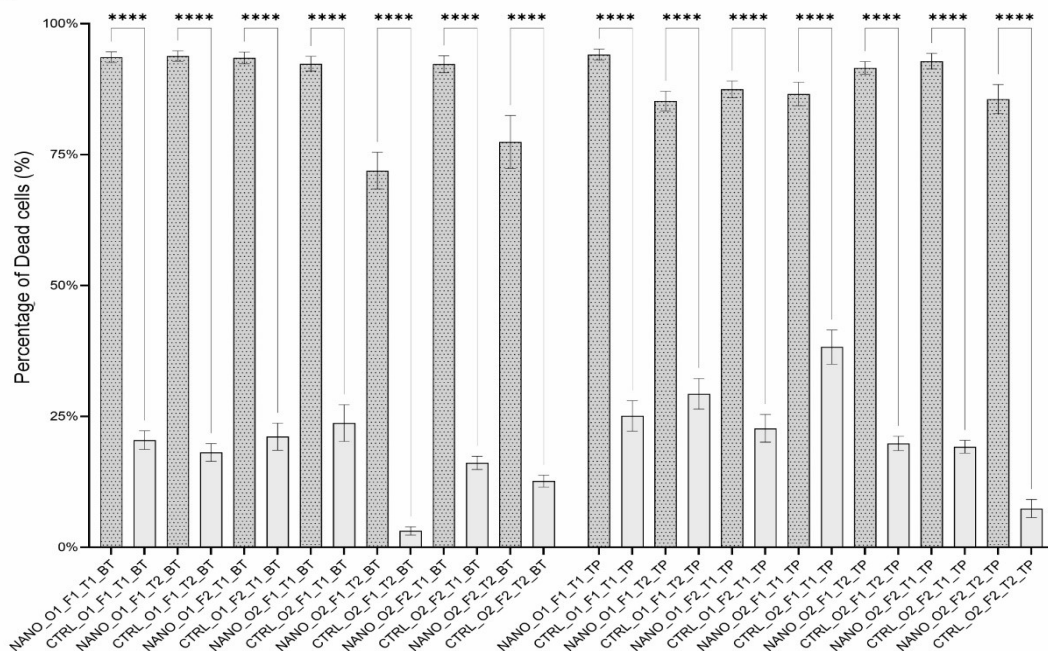

Figure S 2: Bactericidal efficacy of nanostructured and flat surfaces comparison. O = Cell concentration, F = Flowrate, T = Exposure time, 1 = Lower level of the factor, 2 = Higher level of the factor, TP = Top mounted surface, BT = Bottom mounted surface, ns =  $P > 0.05$ , \* =  $P \leq 0.05$ , \*\* =  $P \leq 0.01$ , \*\*\* =  $P \leq 0.001$ , and \*\*\*\* =  $P \leq 0.0001$ .

## Comparison of live and dead cells on flat surface under different conditions

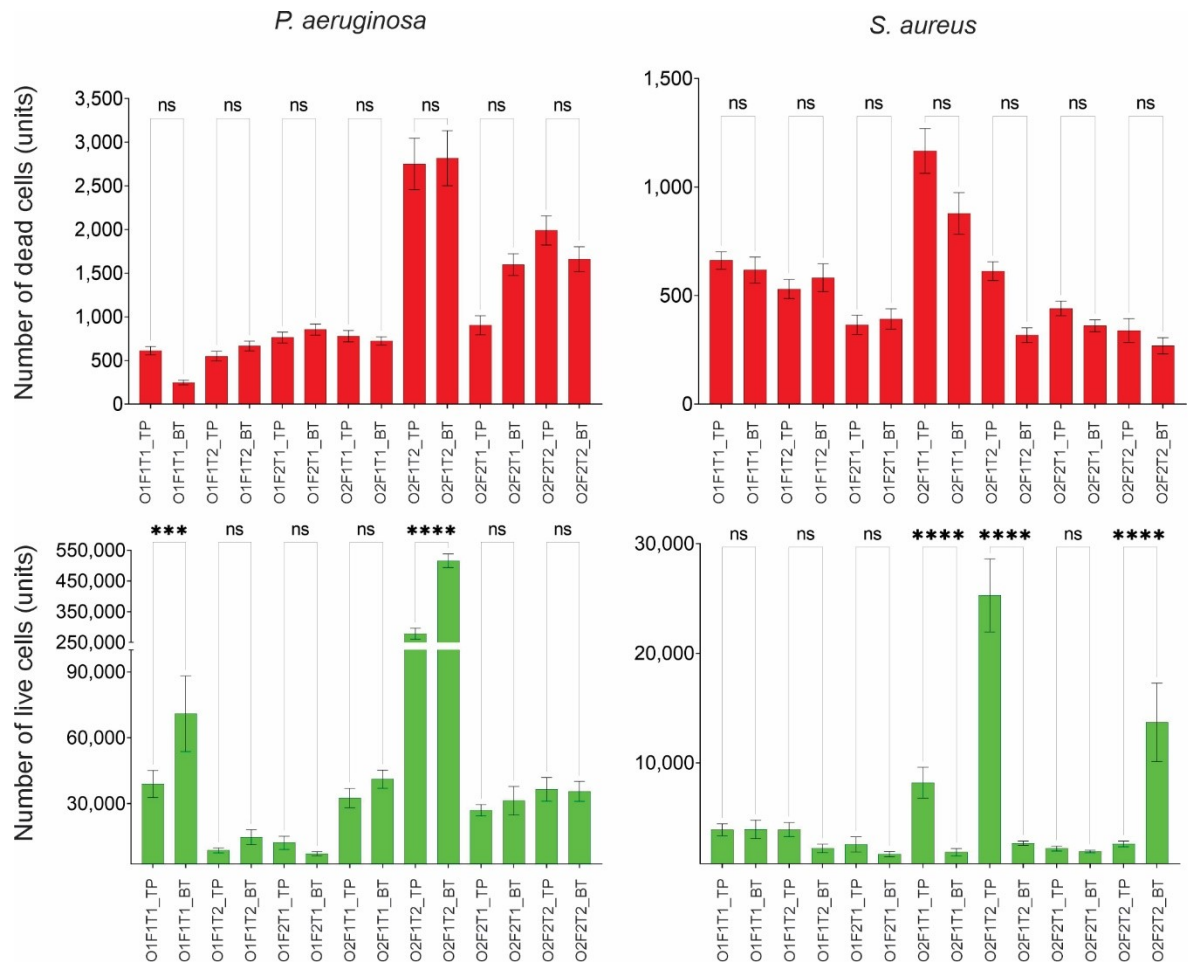

Figure S 3: Live and dead cells on flat surface under different conditions. O = Cell concentration, F = Flowrate, T = Exposure time, 1 = Lower level of the factor, 2 = Higher level of the factor, TP = Top mounted surface, BT = Bottom mounted surface, ns =  $P > 0.05$ , \* =  $P < 0.05$ , \*\* =  $P < 0.01$ , \*\*\* =  $P < 0.001$ , and \*\*\*\* =  $P < 0.0001$ .
